# Supplementary material for: Rapid hydrolytic cleavage of the mRNA model compound HPNP by glycine based macrocyclic lanthanide ribonuclease mimics
Source: Royal Society of Chemistry journal article supplement (doi:10.1039/b205349g), 2002-01-01
Supplement: b205349g.doc [file b205349g.doc]

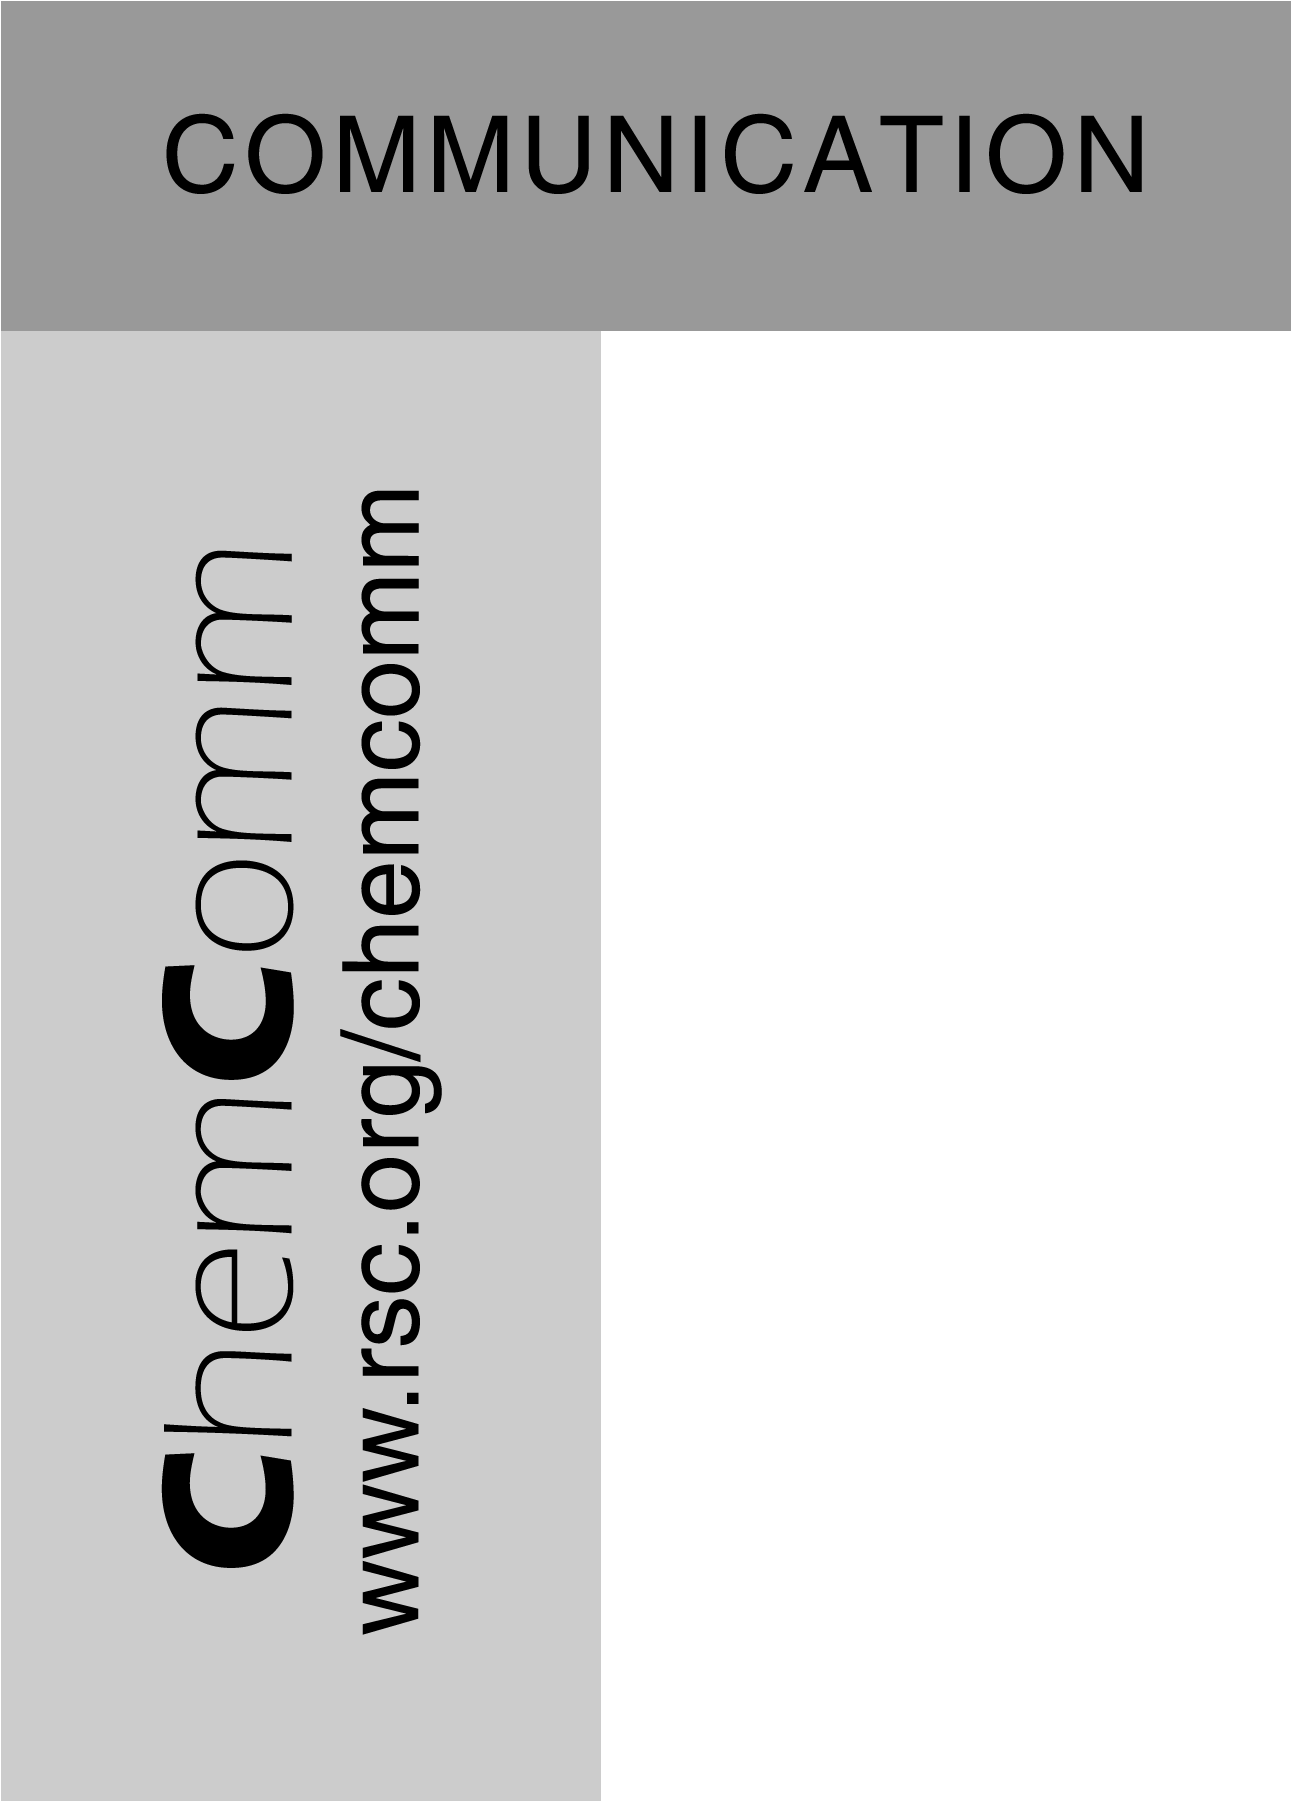
Rapid hydrolytic cleavage of the mRNA model compound HPNP by glycine based macrocyclic lanthanide ribonuclease mimics

Thorfinnur Gunnlaugsson,**a* R. Jeremy H. Davies,*b* Mark Nieuwenhuyzen,*c* Clarke S. Stevenson,*b* Raomain Viguier*a* and Sinead Mulready*a*

a Department of Chemistry, Trinity College Dublin, Dublin 2, Ireland. Fax: 00 353 1 671 2826; Tel: 00 353 1 608 3459; E-mail: gunnlaut@tcd.ie

b School of Biology and Biochemistry, Queen’s University of Belfast, Belfast BT9 7BL, Northern Ireland.

b School of Chemistry, Queen’s University of Belfast, Belfast BT9 5AG, Northern Ireland.

Electronic supplementary information

**Synthesis of L and its lanthanide ion complexes.**

Glycine methyl ester (1)

A solution of SM80 (1.6 g, 9.67 mmol) in dry acetonitrile (10 mL) was added to cyclen (0.405 g, 2.358 mmol), cesium carbonate (3.15 g, 9.67 mmol) and potassium iodide (1.6 g, 9.67 mmol) in dry acetonitrile (30 mL). This was then refluxed under argon for 48 hours. The mixture was filtered through celite and reduced before the residue was taken up in chloroform and washed with water. The organic layer was dried over K2CO3 and reduced to give a white hygroscopic powder.

Yield: 69%; **m.p.** 161-163oC; Anal. Calcd for C28H48N8O12K: C, 46.21; H, 6.65; N, 15.37. Found: C, 46.64; H, 6.88; N, 14.95.; **H (CDCl3, 400Hz**): 7.8 (s, NH), 3.9 (2H, d, CH2), 3.6 (3H, s, CH3), 3.03 (2H, s, CH2), 2.6 (4H, s, cyc-CH2); **C (CDCl3, 100Hz**): 171, 170, 58, 52, 51, 40. **M/Z**: 689 (M+), 711 (MNa+); **Acc Mass:** 689.3470, **IRmax(cm-1)**: 3435, 3071, 2956, 2824, 1749, 1672, 1543, 1439, 1439, 1369, 1310, 1214, 1096, 1003, 883, 806, 700, 589, 505, 378.

Ln Complexes

Lanthanide complexes were prepared by refluxing the ligand with 1.1 molar equivalents of the appropriate lanthanide triflate in dry acetonitrile (10mL) for 16 hours except on the case of the La(III) complex where dry methanol was used instead. The complexes were isolated by addition of the reaction to dry ether (100mL) and filtration of the solid produced.

**La(III) (1.La)**

Expected: 976.1976 (Mtrif), Found: 976.1954,

Yield: 44%; **m.p.** 263-266oC; **H (CD3OD, 400Hz):** 8.3(NH), 4.1, 3.7, 3.4, 2.7, 1.9, 1.1; **M/Z**: 275 (M+/3), 289(MK+/3), 487(Mtrif+/2); **IRmax(cm-1)**: 3444, 3132, 2961, 2359, 2341, 1758, 1631, 1443, 1369, 1251, 1169, 1030, 968, 888, 761, 639, 576, 518, 436, 376.

**Ce(III) (1.Ce)**

Expected: 828.2446 (M), Found: 828.2421,

Yield: 54%; **m.p.** 260-263oC; H (**CD3CN, 400Hz**): 12.1, 9.9, 7.9, 6.7, 5.5, 4.1, .07, -9.8; **M/Z**: 276 (M+/3), 289 (2H2OM+/2), 488 (Mtrif+/2); **IRmax(cm-1)**: 3454, 3132, 2924, 1738, 1629, 1416, 1273, 1229, 1168, 1030, 638, 577, 519.

**Pr(III) (1.Pr)**

Expected: 829.2468 (M), Found: 829.2482,

Yield: 47%; **m.p.** 238-241oC; **H (CD3CN, 400Hz**): 20.1, 17.2, 15.0, 12.4, 7.6, 6.9, 4.67, 2.5, -0.17, -26.53; **M/Z**: 276 (M+/3), 414 (M+/2); **IRmax(cm-1)**: 3436, 3272, 3128, 2960, 1758, 1631, 1368, 1248, 1165, 1028, 714, 638, 573, 519.

**Nd(III) (1.Nd)**

Expected: 830.2469 (M), Found: 830.2456,

Yield: 42%; **m.p.** 240-242oC; **H (CD3CN, 400Hz**): 14.6, 13.2, 11.8, 8.5, 7.6, 7.0, 5.6, 4.1, 2.1, -13.1; **M/Z**: 216 (MK+/4), 277 (M+/3), 416 (M+/2), 490 (Mtrif+/2); **IRmax(cm-1)**:3456, 3121, 2959, 1748, 1632, 1372, 1263, 1165, 1079, 1030, 831, 708, 638, 574, 518.

**Eu(III) (1.Nd)**

Expected: 841.2604 (M), Found: 841.2566

Yield: 22%; **m.p.** 249-252oC; **H (CD3OD, 400Hz**): 31.8, 24.7, 13.3, 9.0, 3.4(d), 1.1(t); **M/Z**: 280 (M+/3), 420 (M+/2), 494(Mtrif+/2), **IRmax(cm-1)**: 3434, 3122, 2926, 1749, 1369, 1250, 1165, 1030, 971, 832, 637, 575, 518.

**Gd(III) (1.Nd)**

NMR was not obtained of Gd(III) complexes due to their relaxation properties.

Expected: 995.2153 (Mtrif), Found: 995.2134

Yield: 62%; **m.p.** 241-245oC; **M/Z**: 282 (M+/3), 391 (M2trif2H2O/3); **IRmax(cm-1)**: 3420, 3131, 2961, 1736, 1633, 1578, 1415, 1269, 1137, 1079, 1030, 971, 637, 577, 520.

**Tb(III) (1.Tb)**

Expected: 847.2645 (M), Found: 487.2651

Yield: 62%; **m.p.** 244-247oC; **H (CD3OD, 400Hz**): 30.7, 24.3, 12.6, 3.4, 1.99, 1.1; **M/Z**: 423 (M+/2), 498 (Mtrif+/2), 1145.5 (M2trif+); **IRmax(cm-1)**: 3433, 3130, 2925, 2854, 1738, 1633, 1415, 1375, 1267, 1167, 1079, 1030, 972, 638, 576, 519.

**Lu(III) (1.Lu)**

Expected: 863.2800 (M), Found: 863.2770

Yield: 59%; **m.p.** 246-249oC; **H (CD3OD, 400Hz**): 8.6 (1H, s, NH), 4.2 (1H), 4.0 (1H), 3.7 (4H), 3.4 (1H), 2.8 (2H), 1.9 (1H); **M/Z**: 288 (M+/3), 431 (M+/2), 506 (Mtrif+/2); **IRmax(cm-1)**: 3440, 3134, 2962, 2361, 1736, 1638, 1581, 1415, 1415, 1267, 1169, 1080, 1030, 972, 892, 798, 713, 636, 577, 519, 424, 365.

**Cu(II) (1.Cu)**

Expected: 752.2766 (M), Found: 752.2779**;** Yield: 39%; **m.p.** 140-143oC; **M/Z**: 303 (Mtrif+/3), 376 (M+/2), 454 (Mtrif+/2), 750(M+), 900(Mtrif+); **IRmax(cm-1)**: 3576, 3371, 3314, 3111, 2963, 2360, 1740, 1657, 1562, 1443, 1369, 1289, 1224, 1027, 639, 572, 516.

Figure S1.

X-ray crystal structure of **1.Eu**. a) Views down the C4 axis of **Eu.L**. Showing the four GlyGly pendent arms coordinating to the Eu(III) ion thorough the four nitrogens of the macrocycle and the oxygens of the adjacent glycine residue. b) Side view of the **Eu.L** complex showing how the four GlyGly residues form the walls of the cavity, with the Eu(III) ion placed in the centre. The ninth coordination side is occupied by a triflate anion, giving the overall mono capped square antiprismatic geometry.

Figure S1A

Figure S1B.

Figure S2. The changes in the rate of hydrolysis of HPNP as a function of pH.

Figure S3.

Figure S3a: **1H NMR (400MHz) of 1:** 7.8 (s, NH), 3.9 (2H, d, CH2), 3.6 (3H, s, CH3), 3.03 (2H, s, CH2), 2.6 (4H, s, cyc-CH2)

Figure S3b: **1H NMR (400MHz) of L.Pr: 20.13, 17, 22, 15,04 , 2.5, 0.17 and –26 and axial and equatorial H of the ring.**

Figure S4. Kinetic measurements of La.1; the cleavage of HPNP:

**Figure 5S. PAGE results for three of the above complexes when cleaving the 24mer mRNA strand from the gag HIV gene.**

**Figure S6. Potentiometric titration of La.L.**

**Titration of La1 :** 181 data points in the pH ranges 3.18 - 9.04 ; L = 0.00494 mmol ; H+ = 0.01496 mmol. Results : K2 = 10.60 ; pKa1 = 8.54 +/- 0.02 ; pKa2 = 8.43 +/- 0.04.

Titration curve of 0.05 mM **La1** in water at 37 oC with *I* = 0.10 M (N(Me)4Cl).

**Titration of La1 :** 103 data points in the ranges 4.30 – 8.57 ; 1 = 0.00536 mmol ; H+ = 0.01197 mmol. Results : K2 = 12.65 ; pKa1 = 8.46 +/- 0.03 ; pKa3 = 8.26 +/- 0.02.

Titration curve of 0.05 mM **La1** in water at 37 oC with *I* = 0.10 M (N(Me)4Cl).

**Titration :** 141 data points in the ranges 5.60 – 9.06 ; L = 0.00492 mmol ; H+ = 0.00961 mmol. Results : K2 = 99.96 ; pKa1 = 8.46 +/- 0.1 ; pKa2 = 7.91 +/- 0.2.

Titration curve of 0.05 mM **LaL** in water at 37 oC with *I* = 0.10 M (N(Me)4Cl).

**Potentiometric Titrations**

The measurements were made at 37 oC and all solutions were prepared with degassed and doubly distilled water. The ionic strength was fixed at *I* = 0.1 M with tetramethylammonium chloride (ALDRICH). The potentiometric titrations were performed using an automatic titrator system, MOLSPIN, equipped with a combined glass electrode (Metrohm, filled with KCl 3 M solution) and connected to a Gateway microcomputer. The electrodes were calibrated to read pH according to the classical method. (A.E.Martell, R.J.Motekaitis, ***Determination and use of Stability Constants***, 2nd ed., VCH Publishers, New York, 1992.) The lanthanum (III) complex of 0.00049 M was titrated with standardized 0.082 M tetramethylammonium hydroxide. Argon was bubbled though the solutions to exclude CO2 and O2. Tetramethylammonium hydroxide solution was standardized against potassium hydrogenphtalate. Carbonate content was checked by Gran’s method. The titration data were refined by the non-linear least squares refinement program SUPERQUAD (P.Gans, A.Sabatini, A.Vacca, *J.Chem.Soc., Dalton Trans*. 1985, 1195-2000.) to determine the deprotonation constants.
